# Supplementary material
Source: publisher figshare collection journal article supplement (https://karger.figshare.com/ndownloader/files/38249301)

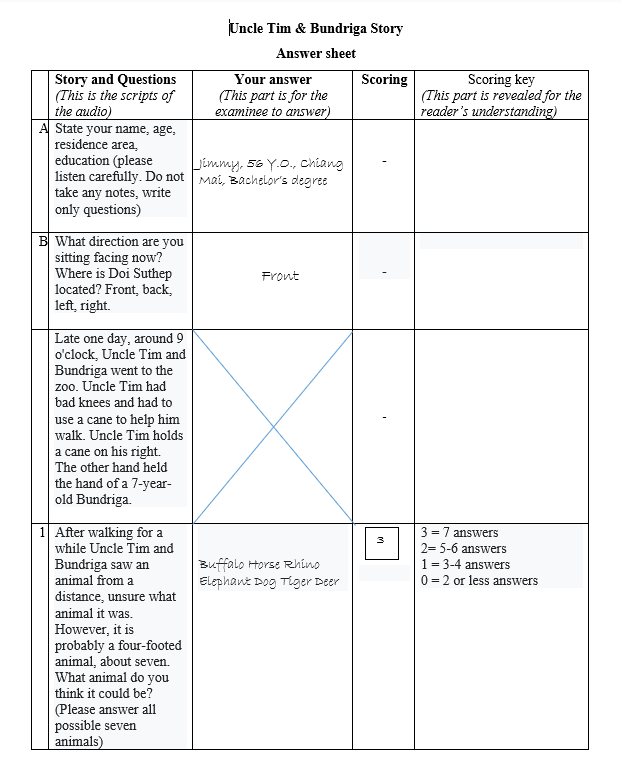

Supplement: Supplementary file 1 [file 38249301]
